# Supplementary material for: Fibrillin-1 Regulates Arteriole Integrity in the Retina
Source: Biomolecules. 2022 Sep 20;12(10):1330. doi: 10.3390/biom12101330 (PMC9599515; doi:10.3390/biom12101330)
Supplement: Supplementary file 1 [file biomolecules-12-01330-s001.zip]

Archive with 4 entries (4 files):
- Supplementary materials-edited-1-11.pdf
- Video S1.mp4
- Video S2.mp4
- Video S3.mp4
